# Supplementary material
Source: Springer Nature journal article supplement (https://www.springermedizin.de/resource/supplementary/12913_2012_2465_MOESM1_ESM.pdf/9530566)
Supplement: MOESM1 [file 9530566]

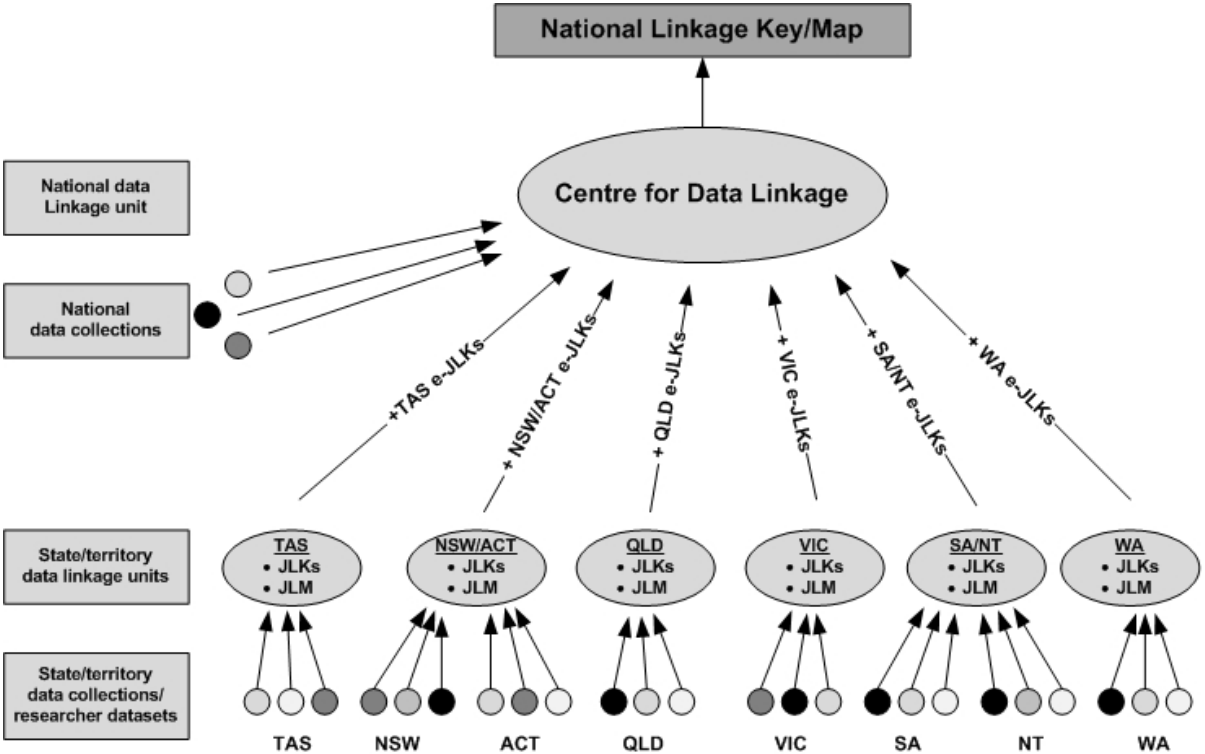

Legend:

- ➔ Demographic data flow
- JLKs: Jurisdictional Linkage Keys
- JLM: Jurisdictional Linkage Map
- e-JLKs: encrypted Jurisdictional Linkage Keys
